# Supplementary material for: Recombination Rate Variation Modulates Gene Sequence Evolution Mainly via GC-Biased Gene Conversion, Not Hill–Robertson Interference, in an Avian System
Source: PubMed Central journal article supplement — Mol Biol Evol. 2015 Oct 6;33(1):216–27. doi: 10.1093/molbev/msv214 (PMC4693978; doi:10.1093/molbev/msv214), 2015-10-06
Supplement: supp_msv214_Sup_Figures_Bolivar_150703_HE.pdf [file supp_msv214_Sup_Figures_Bolivar_150703_HE.pdf]

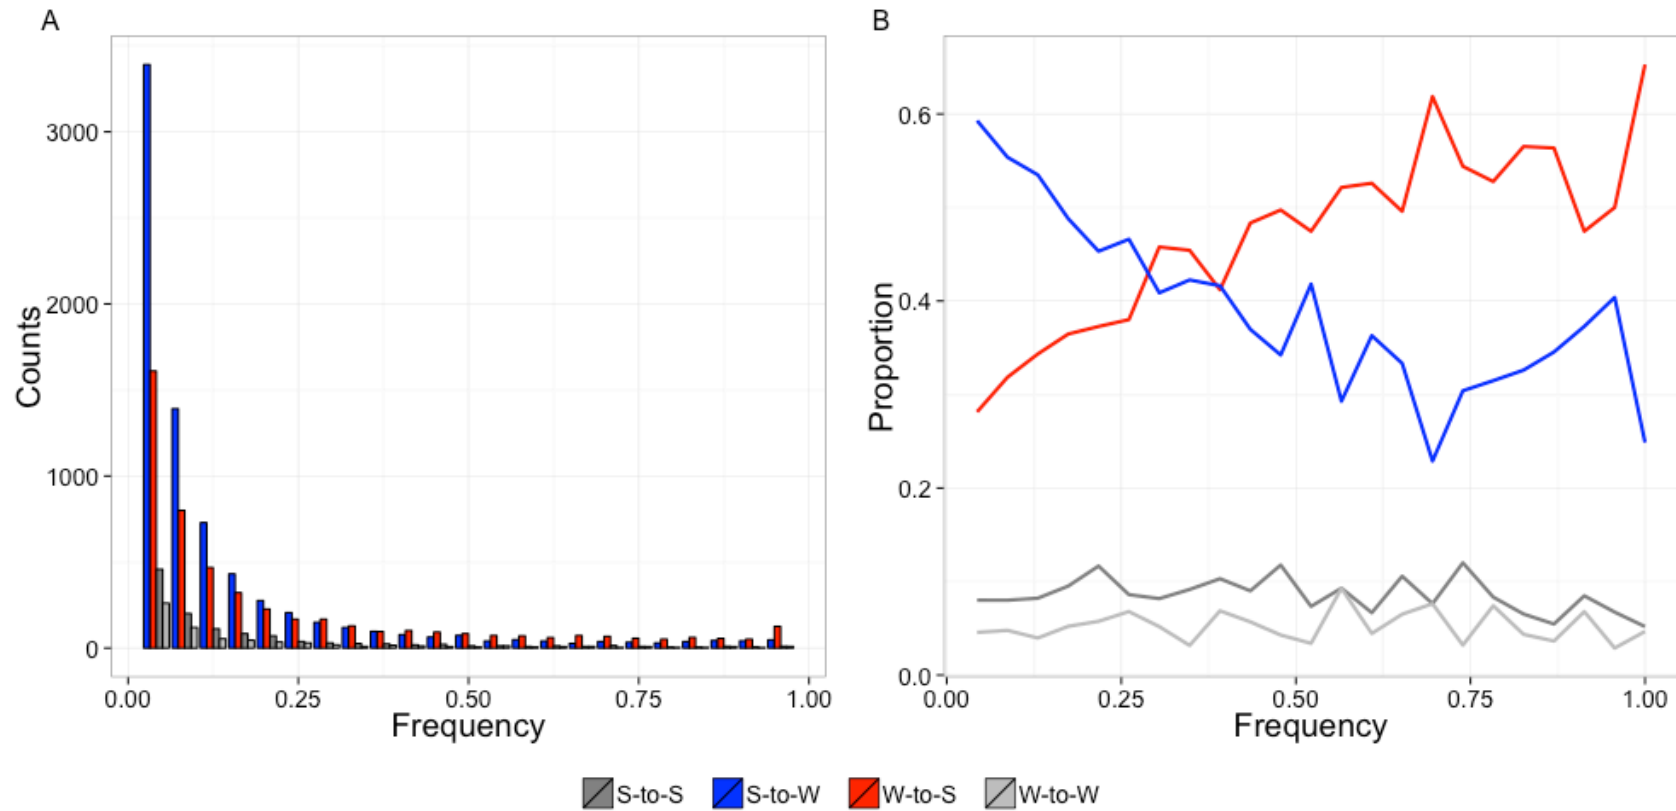

Figure S1. The site frequency spectra (SFS) for different mutation categories at 0-fold degenerated sites: S-to-S (strong-to-strong; dark grey); S-to-W (strong-to-weak; blue); W-to-S (weak-to-strong; red); W-to-W (weak-to-weak; light grey). (A) SFS based on derived allele counts from 14,354 polymorphic sites. (B) Proportion of each mutation category for a given derived allele frequency.

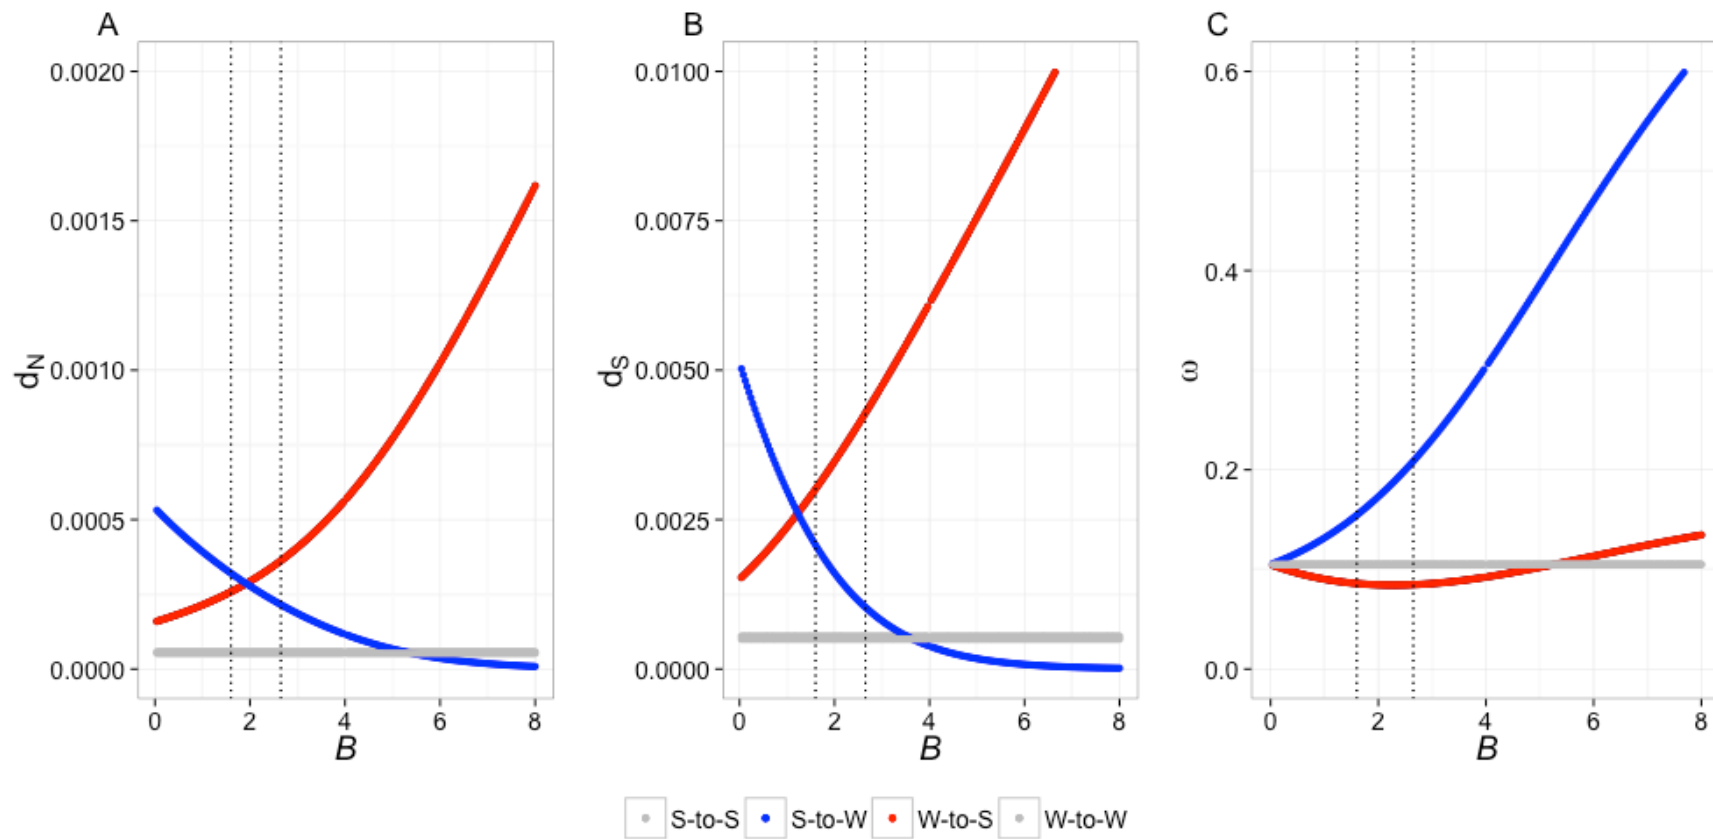

Figure S2. Mathematical description of the effect of gBGC on  $d_N$ ,  $d_S$  and  $\omega$  for different mutation categories; S-to-W (strong-to-weak; blue); W-to-S (weak-to-strong; red); W-to-W and S-to-S (weak-to-weak and strong-to-strong; grey). Dashed vertical lines indicate the range of observed values of  $GC^*$  in the different recombination bins.
